# Supplementary figures and images for: AMBRA1 is able to induce mitophagy via LC3 binding, regardless of PARKIN and p62/SQSTM1
Source: PubMed Central journal article supplement — Cell Death Differ. 2014 Sep 12;22(3):419–32. doi: 10.1038/cdd.2014.139 (PMC4326570; doi:10.1038/cdd.2014.139), 2014-09-12

Suppl. Figure 1

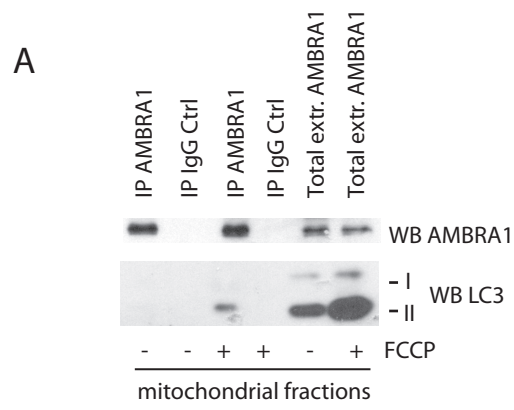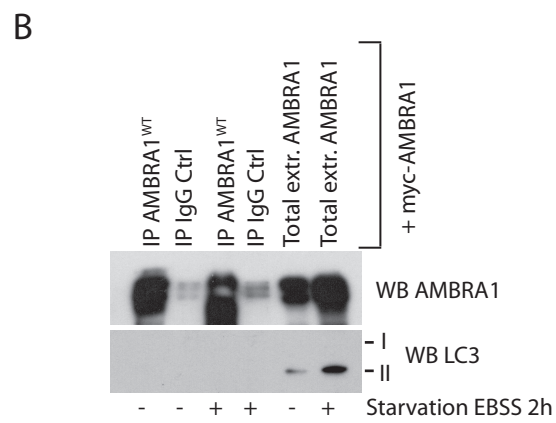

Supplement: cdd2014139x1.pdf [file cdd2014139x1.pdf]

A

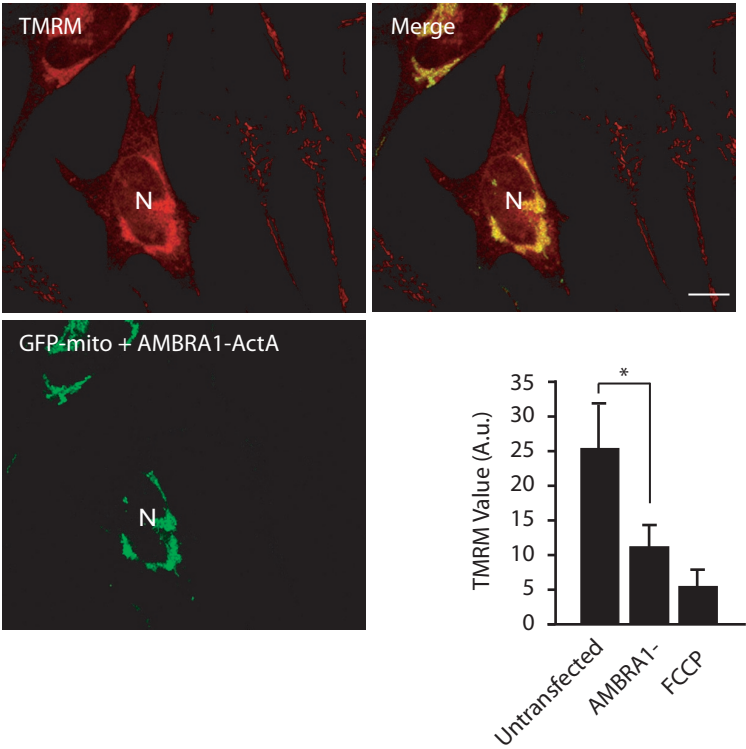

B

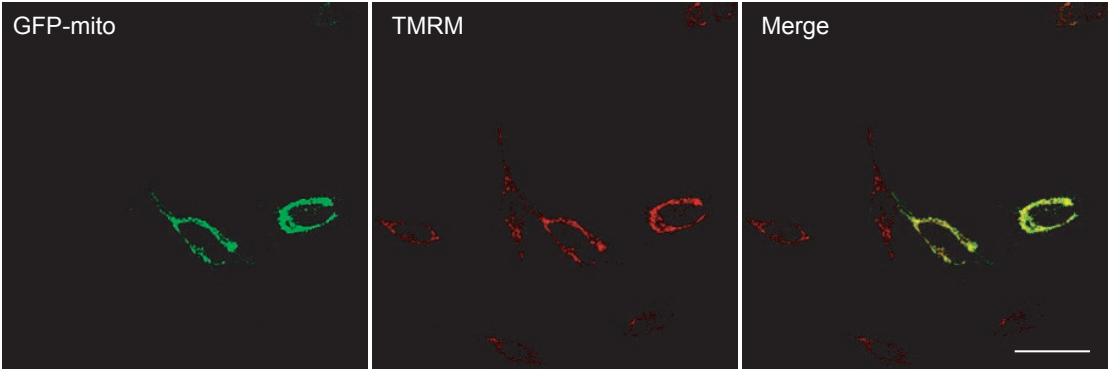

Supplement: cdd2014139x10.pdf [file cdd2014139x10.pdf]

Suppl. Figure 2

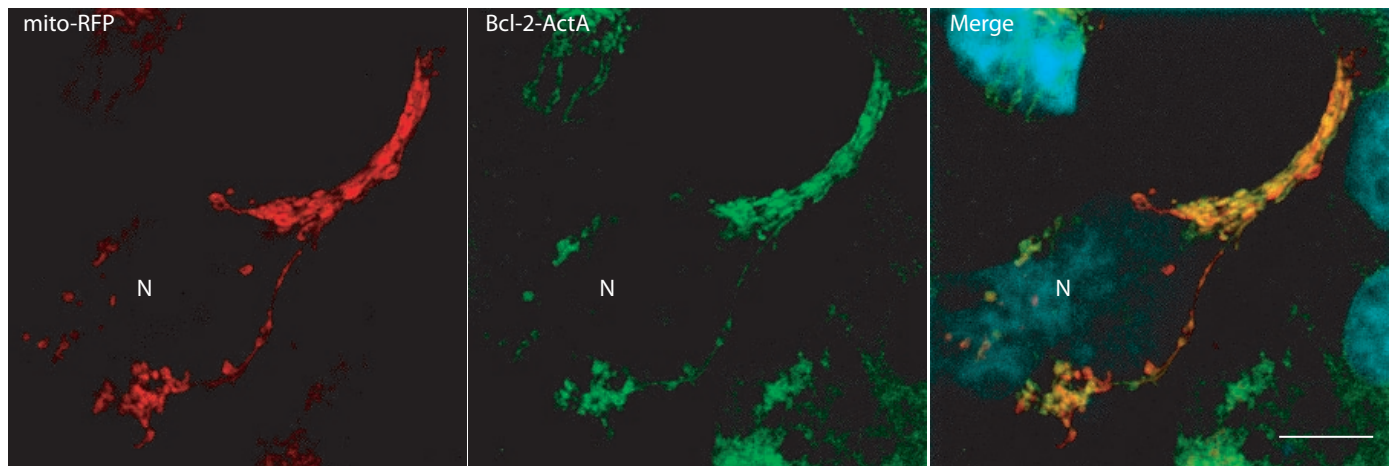

Supplement: cdd2014139x2.pdf [file cdd2014139x2.pdf]

Suppl. Figure 3

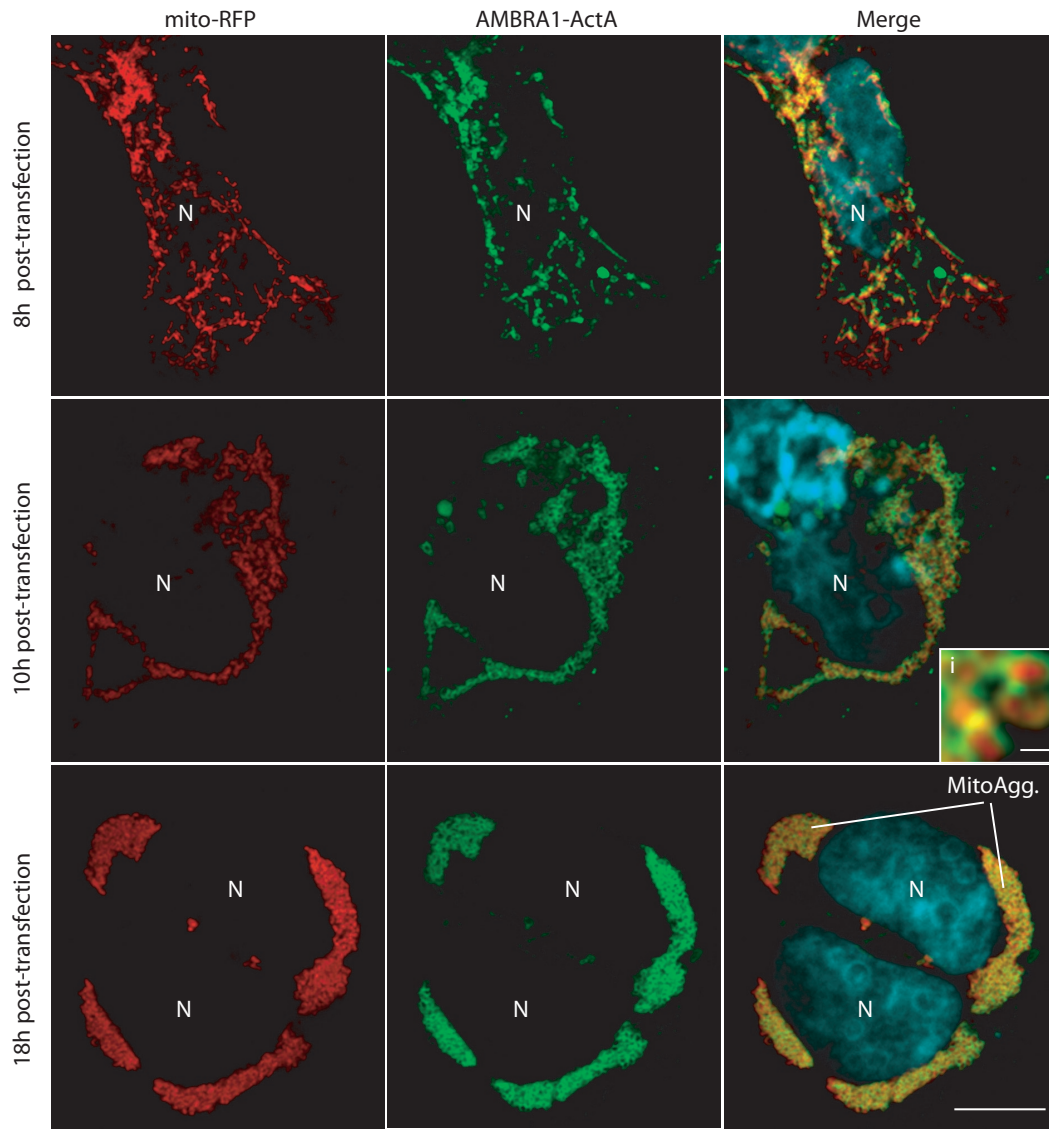

Supplement: cdd2014139x3.pdf [file cdd2014139x3.pdf]

Suppl. Figure 4

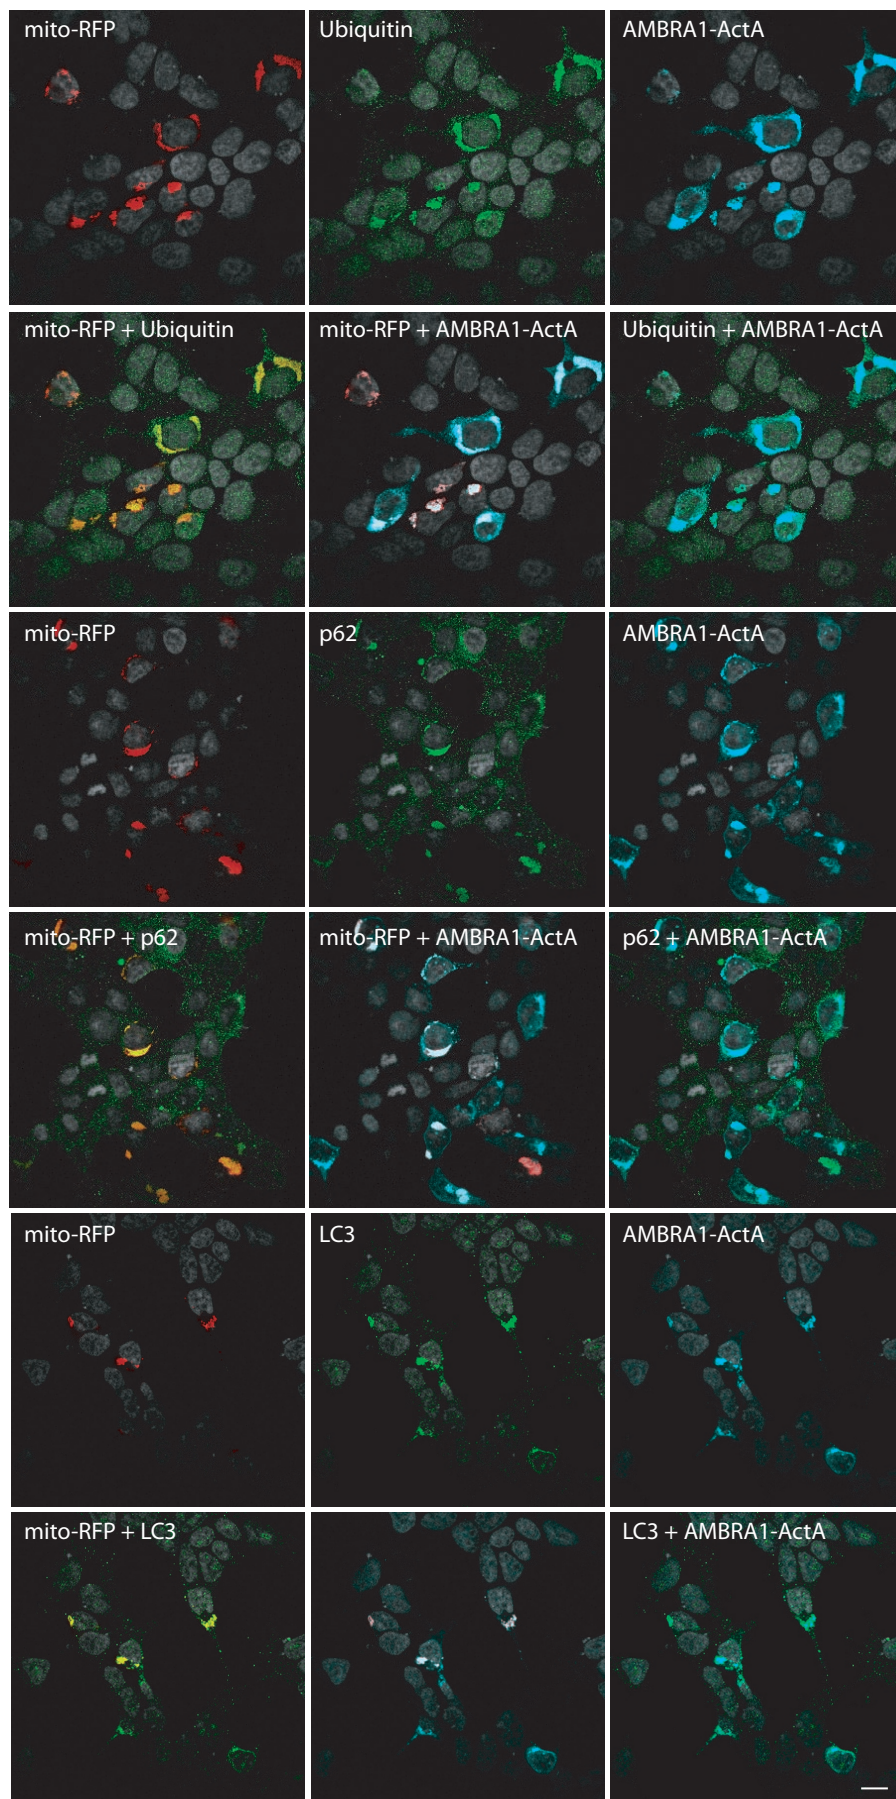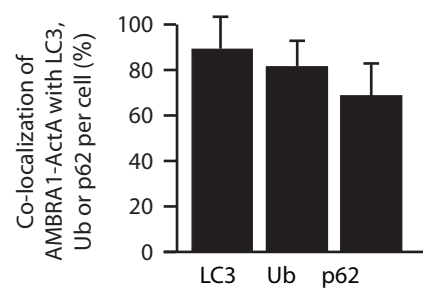

Supplement: cdd2014139x4.pdf [file cdd2014139x4.pdf]

Whole cell, AMBRA1-WT

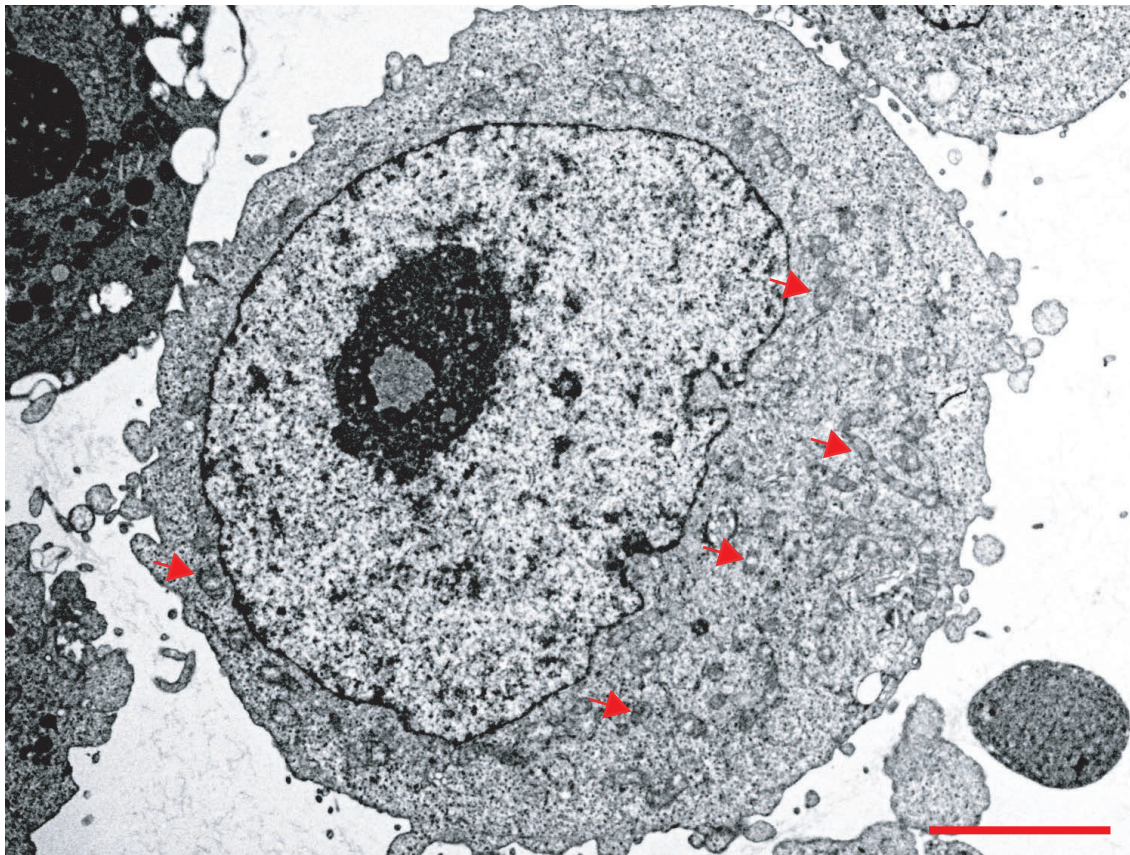

Supplement: cdd2014139x5.pdf [file cdd2014139x5.pdf]

Suppl. Figure 6

A

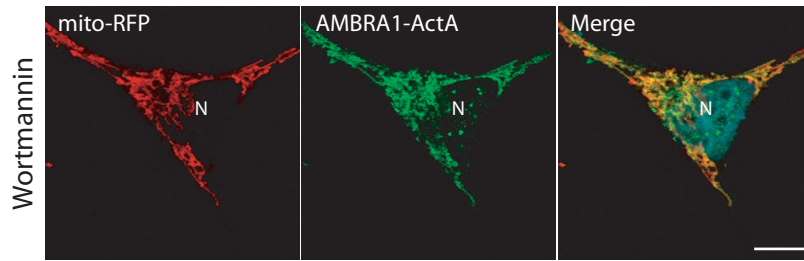

B

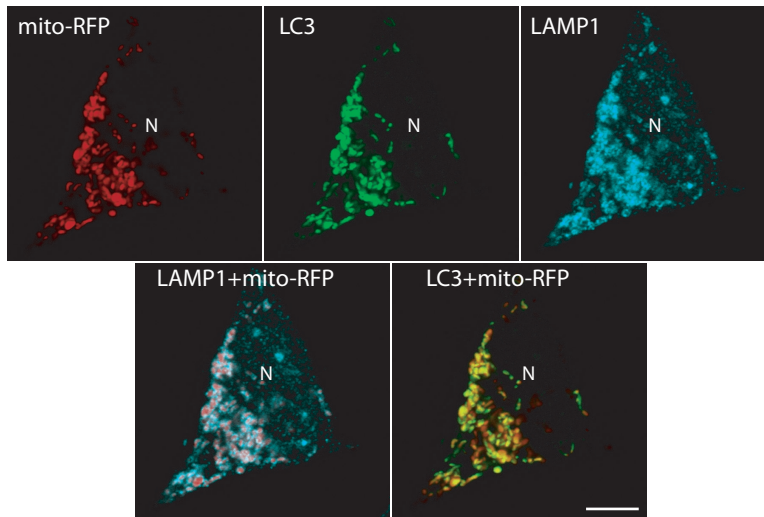

C

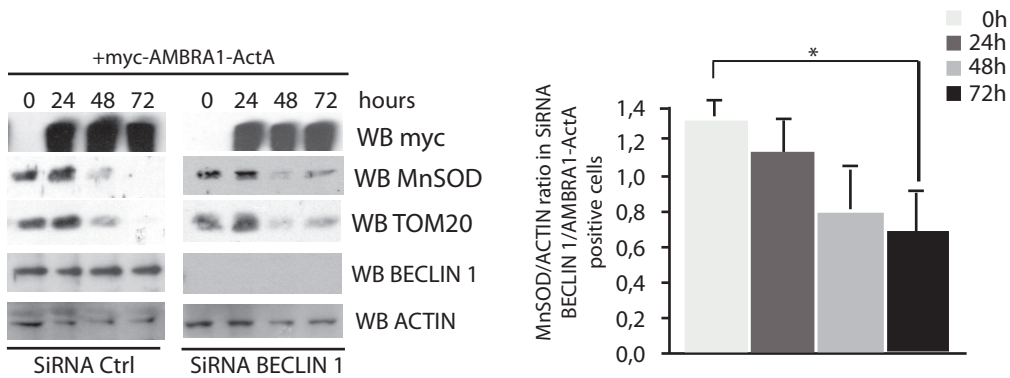

D

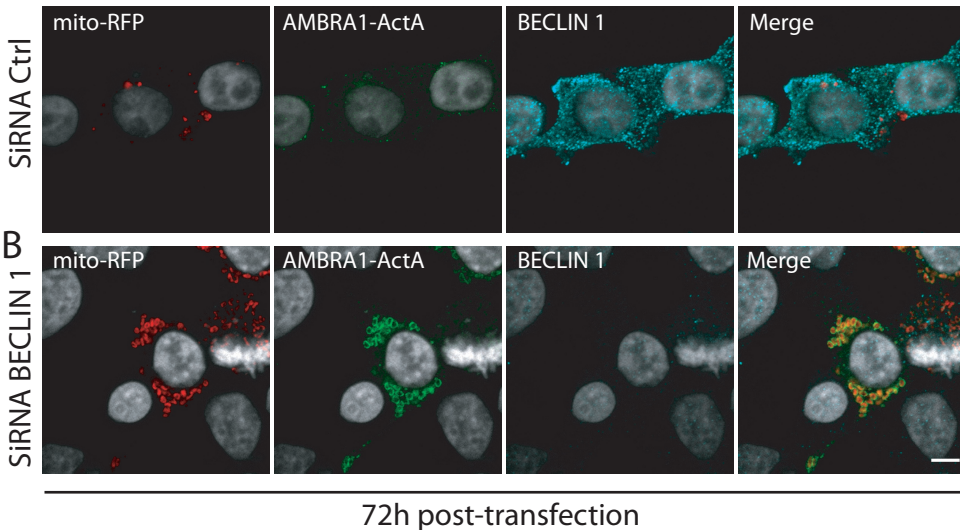

Supplement: cdd2014139x6.pdf [file cdd2014139x6.pdf]

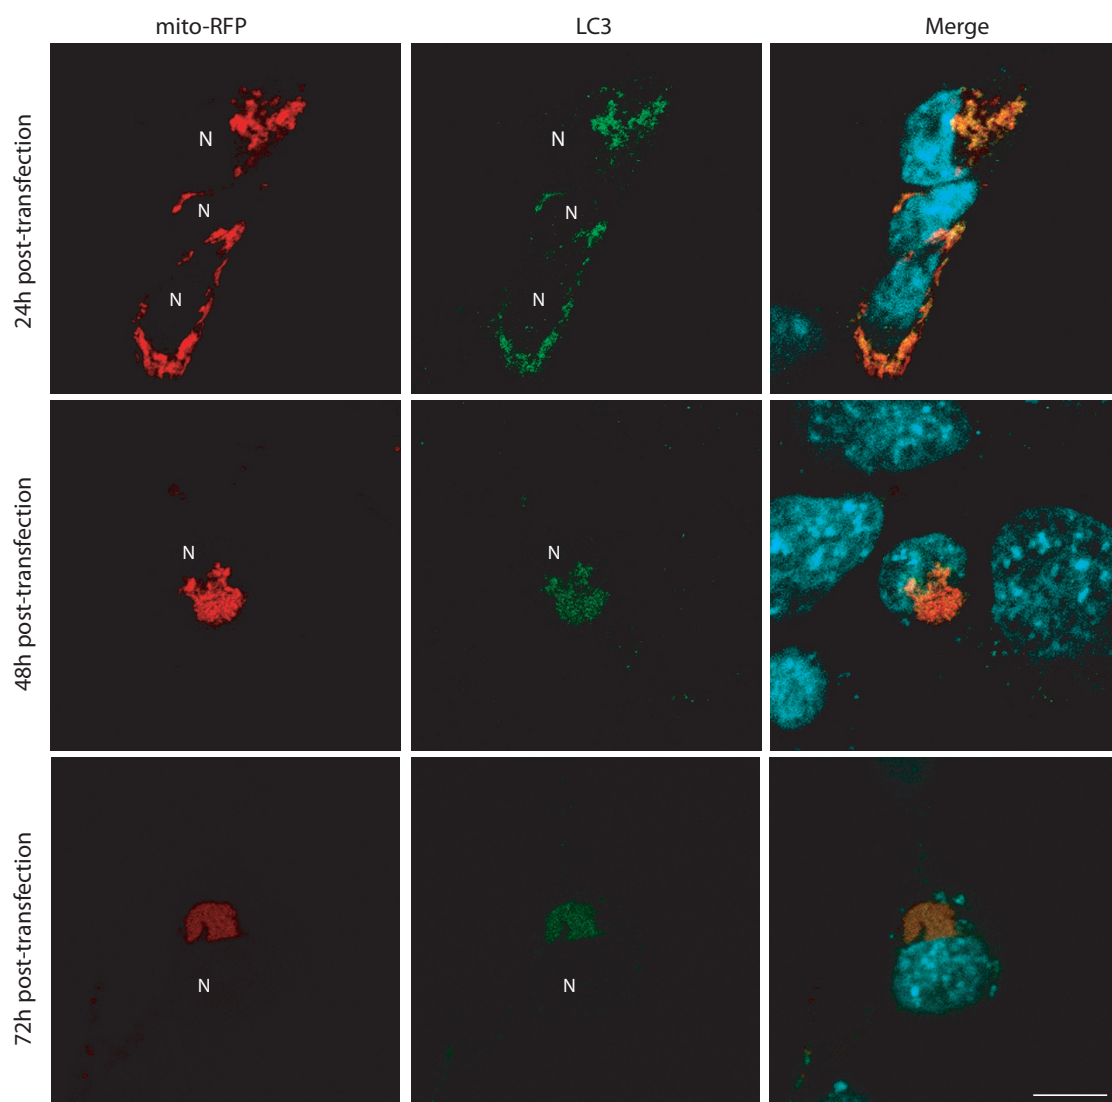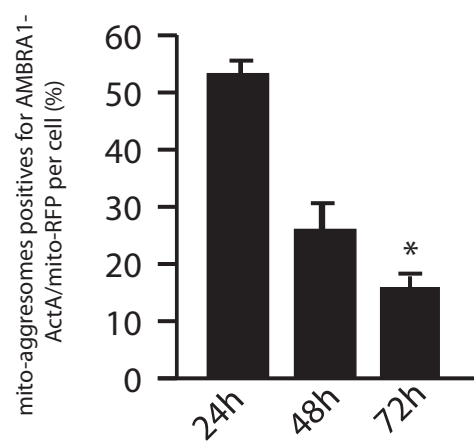

Supplement: cdd2014139x7.pdf [file cdd2014139x7.pdf]

A

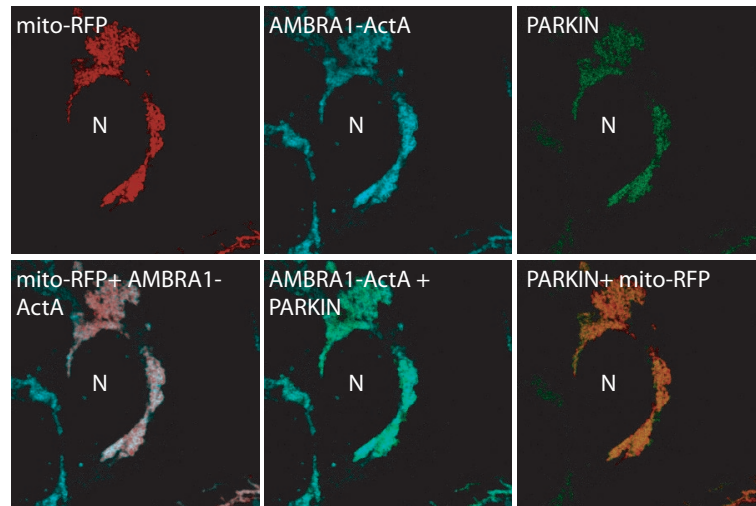

B

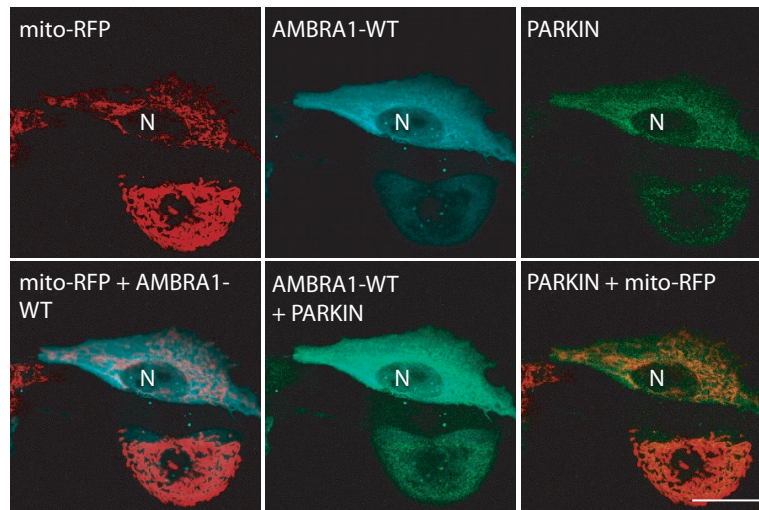

Supplement: cdd2014139x8.pdf [file cdd2014139x8.pdf]

Suppl. Figure 9

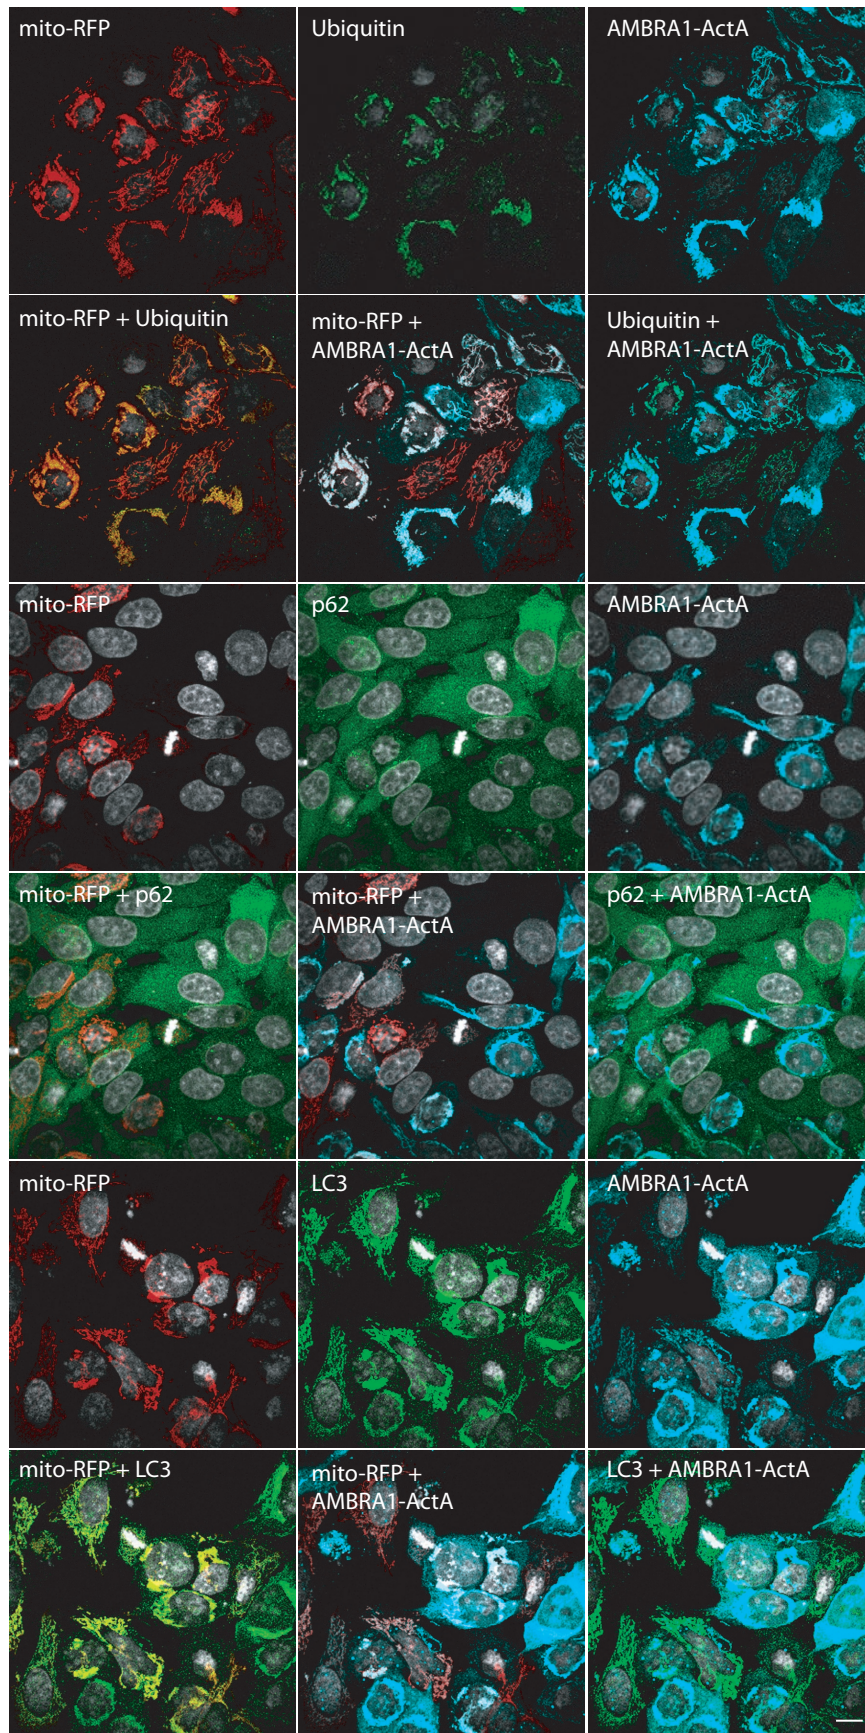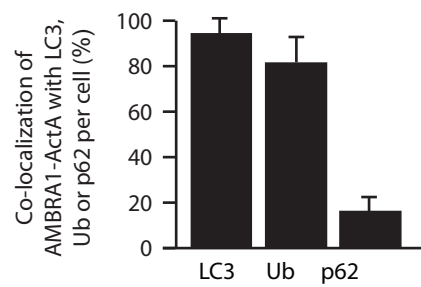

Supplement: cdd2014139x9.pdf [file cdd2014139x9.pdf]
